# Supplementary material for: Ultrafast formation of porosity and heterogeneous structures on 2D oxides via momentary photothermal effect
Source: Royal Society of Chemistry journal article supplement (doi:10.1039/d4ta06114d), 2024-11-28
Supplement: d4ta06114d1.pdf [file d4ta06114d1.pdf]

## Supporting Information

### Ultrafast Formation of Porosity and Heterogeneous Structure on 2D oxides via Momentary Photothermal Effect

*Ahrom Ryu<sup>†</sup>, Bo-In Park<sup>†</sup>, Hyun-Jae Lee, Jung-Won An, Jeong-Jun Kim, Sahn Nahm, Seong H. Kim, Byungju Lee\*, Ji-Won Choi\* and Ji-Soo Jang\**

A. Ryu, J.-W. Ahn, Dr. J.-S. Jang, Dr. J.W. Choi

Electronic Materials Research Center, Korea Institute of Science and Technology, Seongbuk-gu, Seoul 02792, Republic of Korea

E-mail: [jwchoi@kist.re.kr](mailto:jwchoi@kist.re.kr), [wkdwltn92@kist.re.kr](mailto:wkdwltn92@kist.re.kr)

Dr. J.W. Choi

Division of Nano & Information Technology, KIST School, University of Science and Technology, Seoul 02792, Republic of Korea

Dr. H.-J. Lee, Dr. B. Lee

Computational Science Research Center, Korea Institute of Science and Technology, Seongbuk-gu, Seoul 02792, Republic of Korea

E-mail: [blee89@kist.re.kr](mailto:blee89@kist.re.kr)

J.-J. Kim

Department of Physics and Astronomy, Seoul National University, 1 Gwanak-ro, Gwanak-gu, Seoul, 08826, Korea

Seong H. Kim

Department of Chemical Engineering and Materials Research Institute, Pennsylvania State University, University Park, PA 16802, USA

A. Ryu, S. Nahm

Department of Material Science and Engineering, Korea University, Seoul 02841, Korea

Dr. B.-I Park

M.O.P. Materials, Seoul 07285, Republic of Korea

Keywords: 2D oxide, Formaldehyde, Chemical sensor, Flash-thermal shock

## Supplementary data

**Fig. S1** (a) The schematic of fabricating the Titania nanosheet film using drop coating method and (b) the photo of the sensor

**Fig. S2.** SEM images of layered (a) KTLO and (b) HTO powder

**Fig. S3** Atomic force microscopy (AFM) images of  $\text{Ti}_{0.87}\text{O}_2$  nanosheets and the corresponding (b) the thickness and (c) lateral size distribution

**Fig. S4** The schematic of formation porous and reduced nanoparticles on surface of  $\text{Ti}_{0.87}\text{O}_{2-x}$  nanosheets

**Fig. S5.** The TEM-EDS analysis of the spherical Ti nanoparticles (Area 1 and 2, respectively) on the surface of FTS- $\text{Ti}_{0.87}\text{O}_2$

**Fig. S6.** TEM and FFT images of the samples. Top panel:  $\text{Ti}_{0.87}\text{O}_2$ , Bottom panel: FTS- $\text{Ti}_{0.87}\text{O}_2$  (a,e) TEM images (b,f) The fast Fourier transform pattern of the selected red box (c,g) The calculated d-spacing values from HR-TEM (d,h) The intensity profile showing an interlayer spacing between the monolayers in the nanosheets.

**Fig. S7.** EPR spectra of FTS- $\text{Ti}_{0.87}\text{O}_2$

**Fig. S8** The survey XPS spectra of the 2D titania nanosheets.

**Fig S9.** (a) X-ray photoelectron spectroscopy (XPS) of pristine  $\text{Ti}_{0.87}\text{O}_2$  nanosheets and (b) After FTS irradiation  $\text{Ti}_{0.87}\text{O}_2$  nanosheets for Ti 2p and O 1s, respectively

**Fig. S10.** The UV-Vis analysis was conducted before and after FTS irradiation

**Fig. S11** The Raman spectra of the pristine  $\text{Ti}_{0.87}\text{O}_2$  and FTS- $\text{Ti}_{0.87}\text{O}_2$  samples

**Fig. S12.** The HCHO gas sensing properties under various FTS voltages (250, 300, 350, 400, 450 and 500 V).

**Fig S13.** (a) XRD analysis of  $\text{Ti}_{0.87}\text{O}_2$  and FTS- $\text{Ti}_{0.87}\text{O}_2$ , and (b) after cycle test conditions, respectively

**Fig S14.** SEM images of  $\text{Ti}_{0.87}\text{O}_2$  and FTS- $\text{Ti}_{0.87}\text{O}_2$ : (a, b) before and (c, d) after cycle test conditions

**Fig. S15** Gas sensing properties of FTS- $\text{Ti}_{0.87}\text{O}_2$  of formaldehyde gas detection in various mixing gases (toluene, ammonia, formaldehyde)

**Fig. S16.** The photo of the sensing system in working condition.

**Table S1.** Comparison of the sensing performance of HCHO sensors at room temperature.

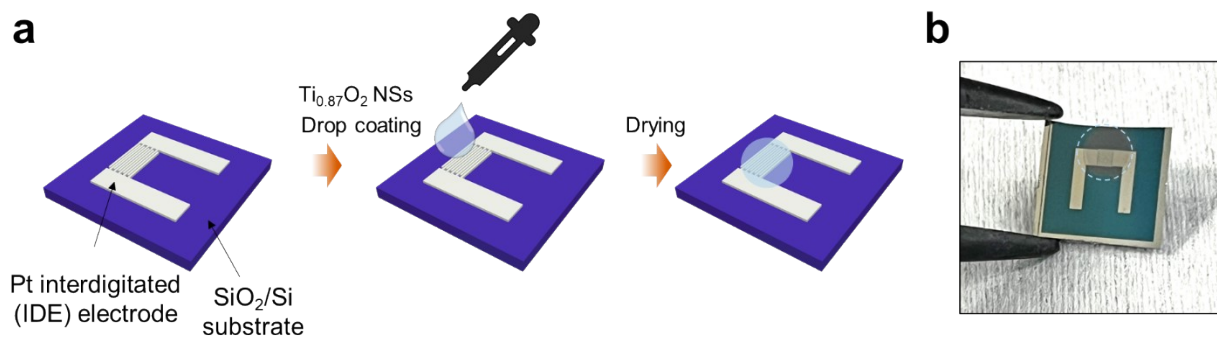

**Fig. S1** (a) The schematic of fabricating the Titania nanosheet film using drop coating method and (b) the photo of the sensor

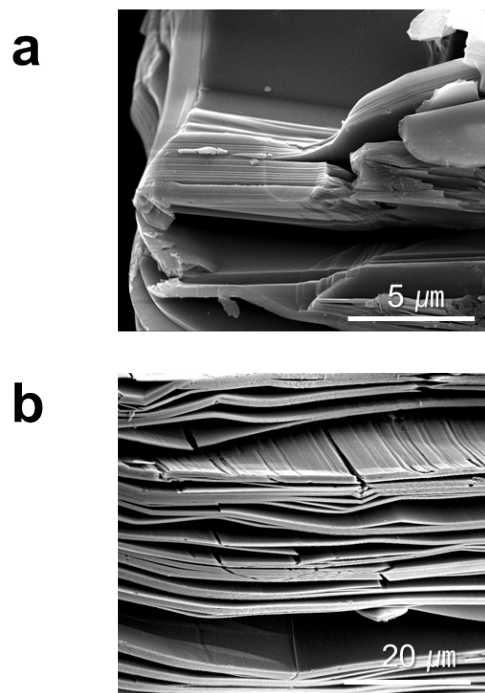

**Fig. S2.** SEM images of layered (a) KTLO and (b) HTO powder

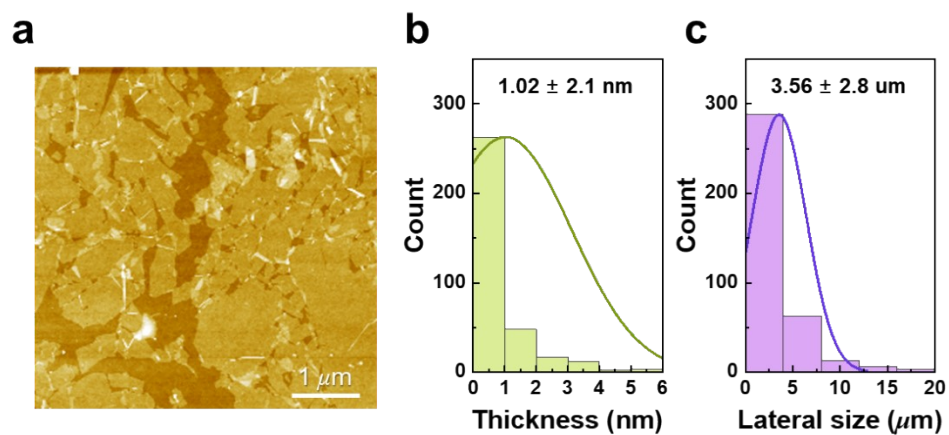

**Fig. S3** Atomic force microscopy (AFM) images of  $\text{Ti}_{0.87}\text{O}_2$  nanosheets and the corresponding (b) the thickness and (c) lateral size distribution

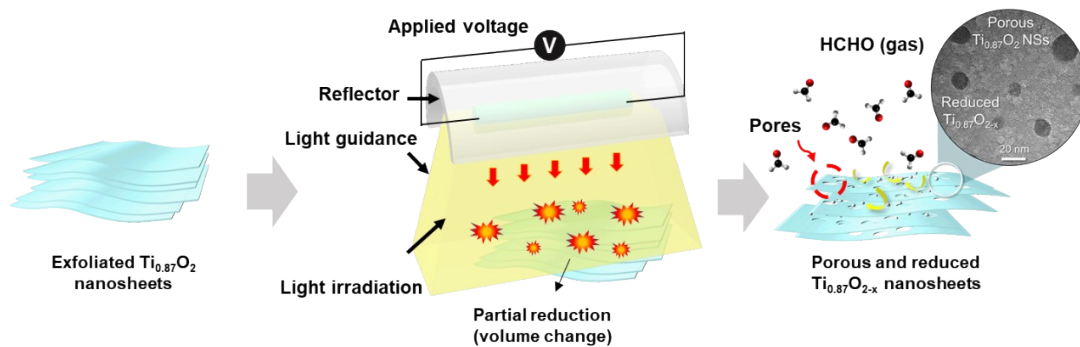

**Fig. S4** The schematic of formation porous and reduced nanoparticles on surface of  $\text{Ti}_{0.87}\text{O}_{2-x}$  nanosheets

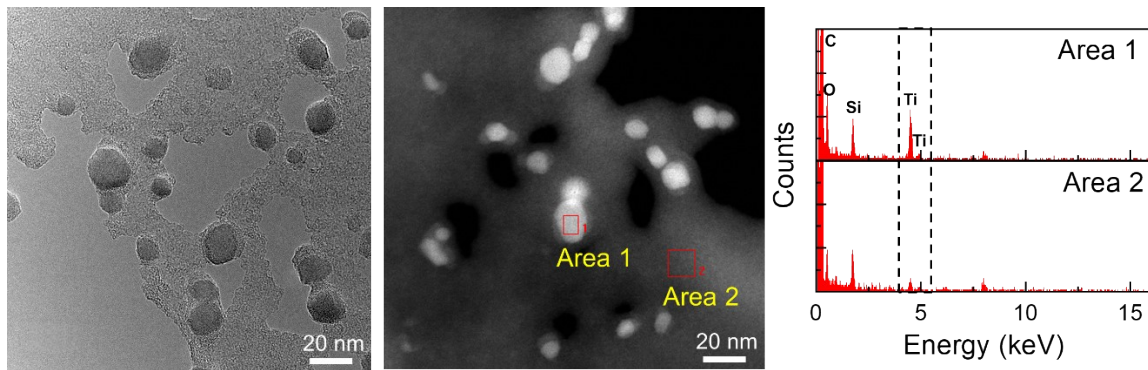

**Fig. S5.** The TEM-EDS analysis of the spherical Ti nanoparticles (Area 1 and 2, respectively) on the surface of FTS-Ti<sub>0.87</sub>O<sub>2</sub>



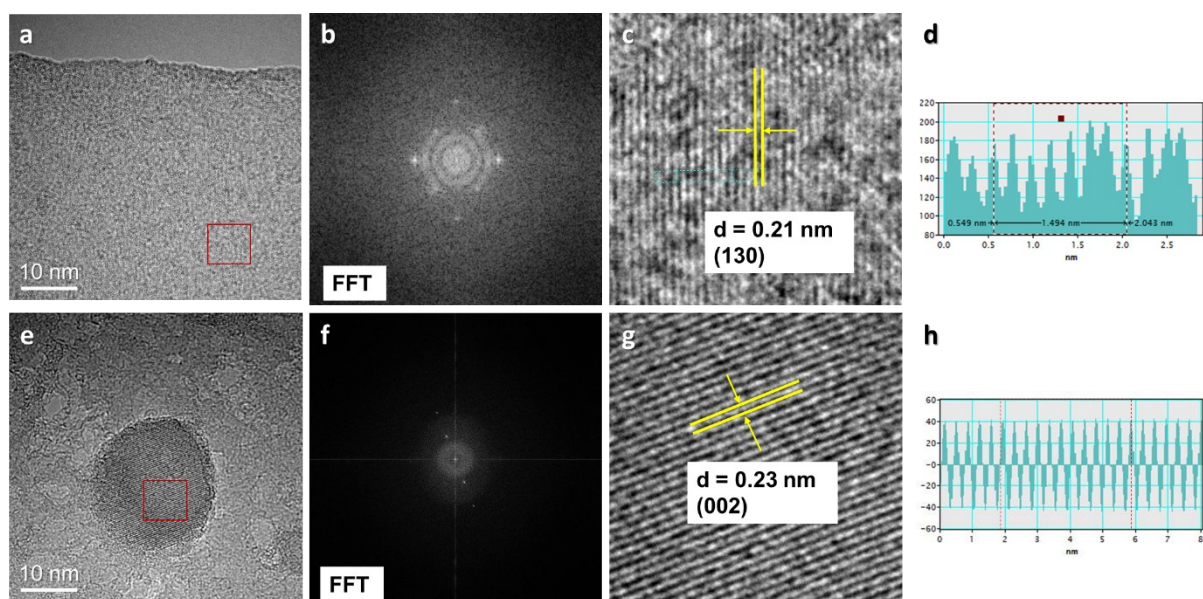

**Fig. S6.** TEM and FFT images of the samples. Top panel:  $\text{Ti}_{0.87}\text{O}_2$ , Bottom panel: FTS- $\text{Ti}_{0.87}\text{O}_2$  (a,e) TEM images (b,f) The fast Fourier transform pattern of the selected red box (c,g) The calculated d-spacing values from HR-TEM (d,h) The intensity profile showing an interlayer spacing between the monolayers in the nanosheets.

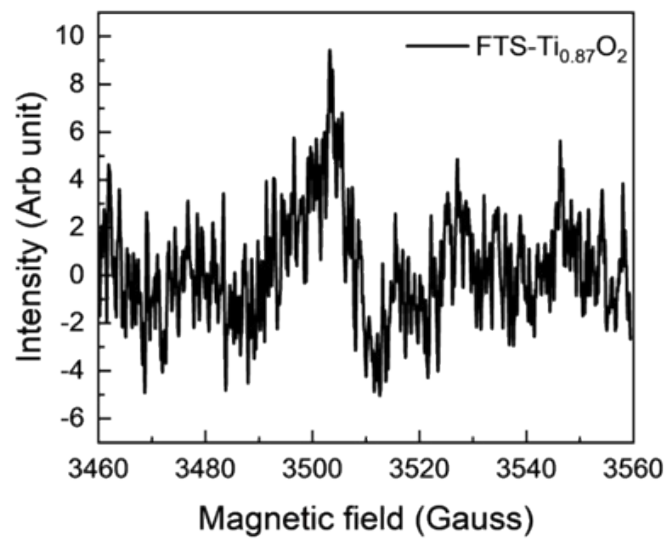

**Fig. S7.** EPR spectra of FTS-Ti<sub>0.87</sub>O<sub>2</sub>

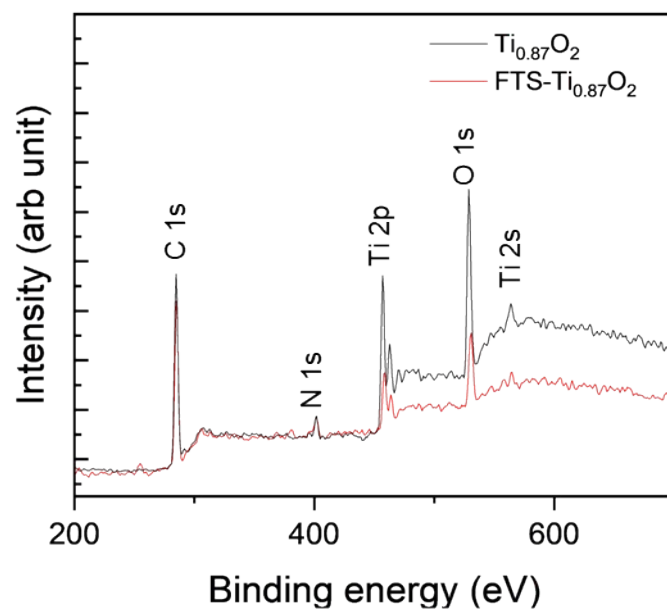

**Fig. S8** The survey XPS spectra of the 2D titania nanosheets.

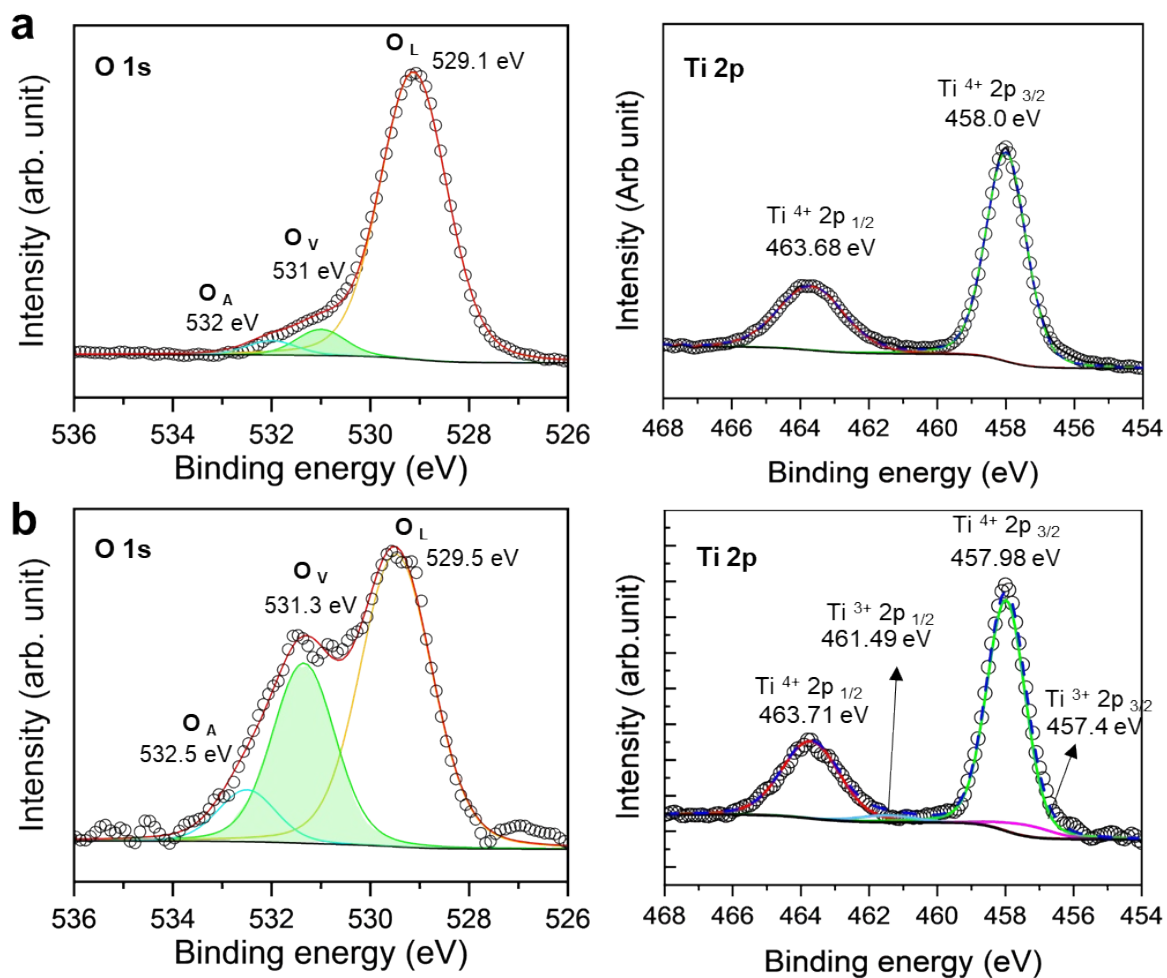

**Fig S9.** (a) X-ray photoelectron spectroscopy (XPS) of pristine  $Ti_{0.87}O_2$  nanosheets and (b) After FTS irradiation  $Ti_{0.87}O_2$  nanosheets for Ti 2p and O 1s, respectively

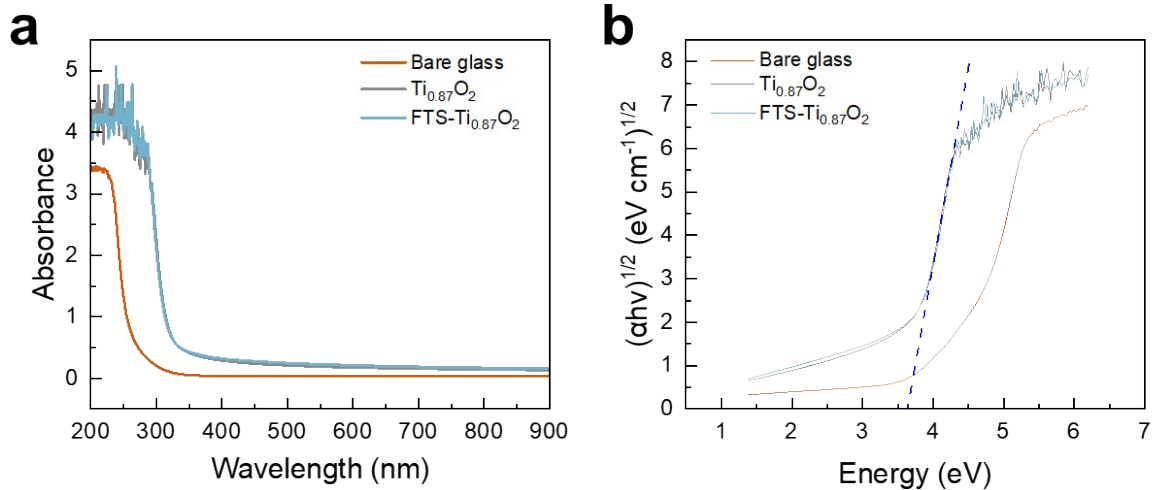

**Fig. S10.** The UV-Vis analysis was conducted before and after FTS irradiation

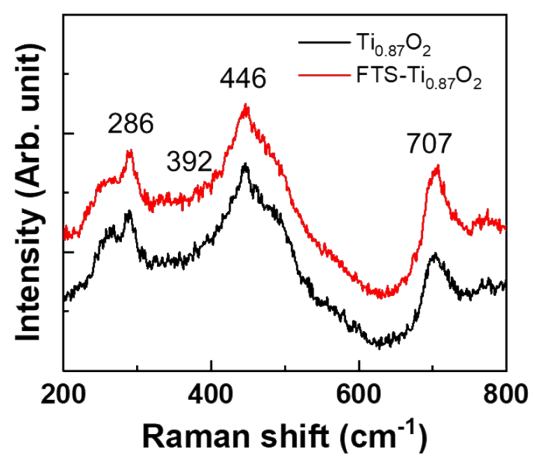

**Fig. S11** The Raman spectra of the pristine Ti<sub>0.87</sub>O<sub>2</sub> and FTS-Ti<sub>0.87</sub>O<sub>2</sub> samples

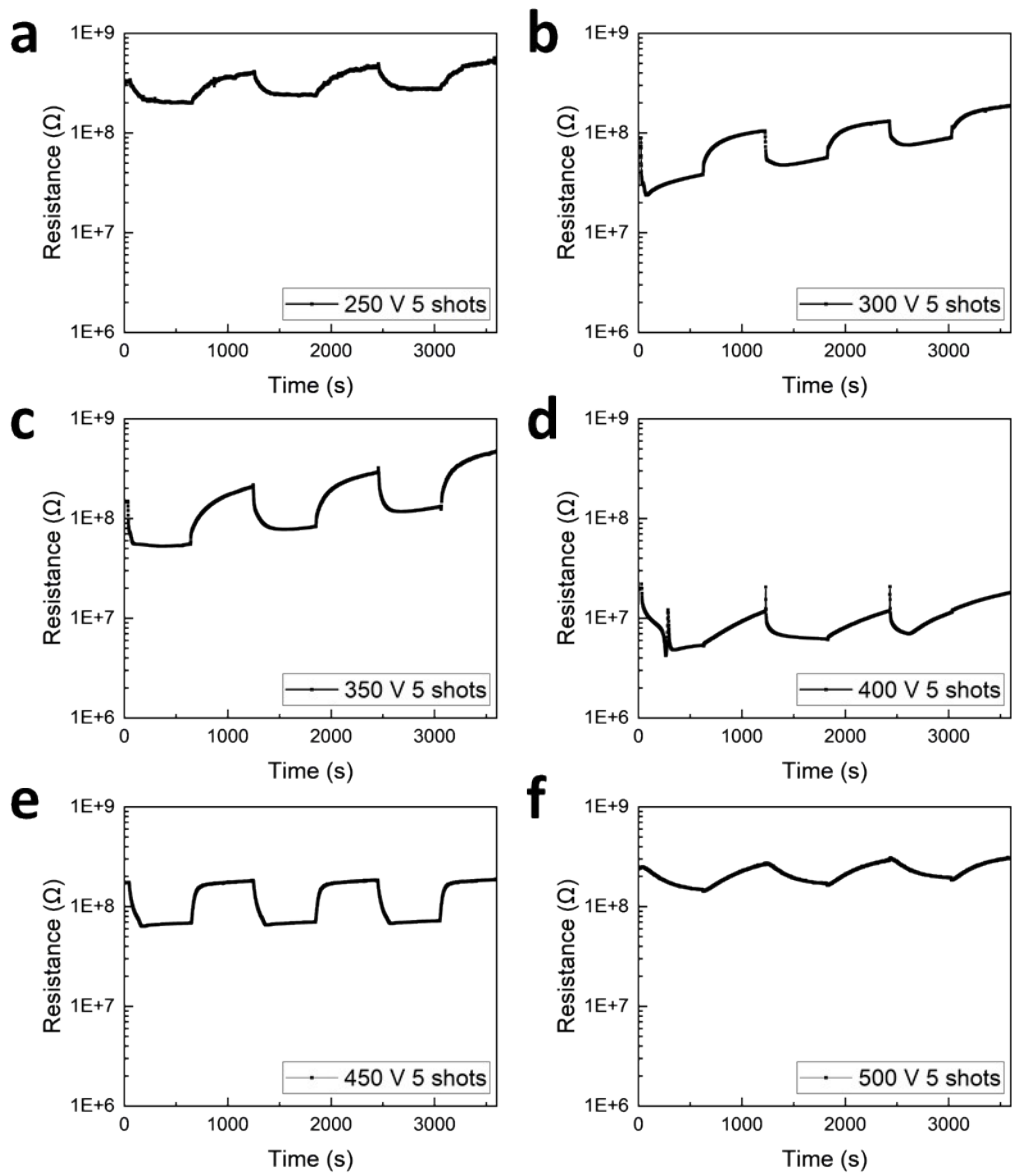

**Fig. S12.** The HCHO gas sensing properties under various FTS voltages (250, 300, 350, 400, 450 and 500 V).

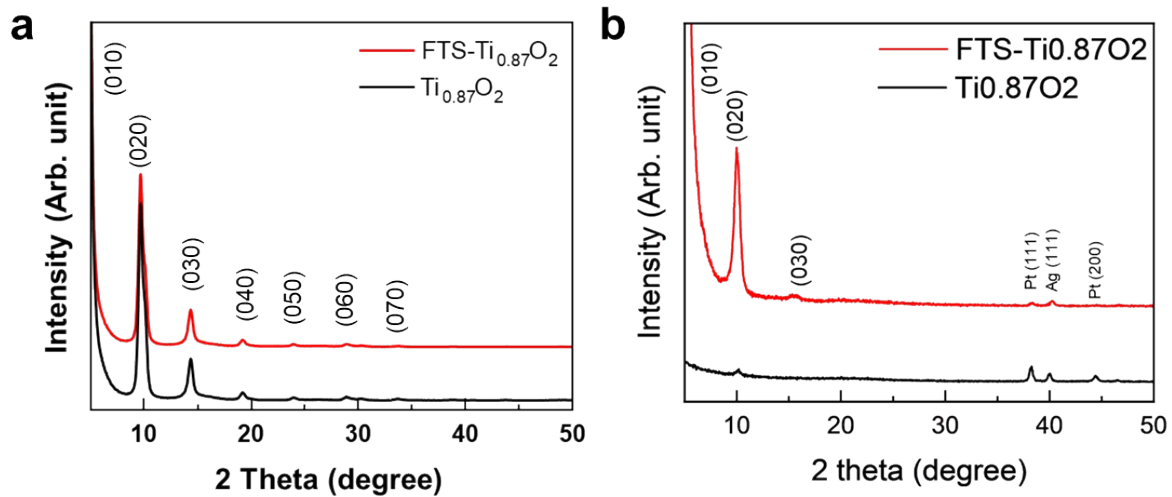

**Fig S13.** (a) XRD analysis of  $\text{Ti}_{0.87}\text{O}_2$  and  $\text{FTS-Ti}_{0.87}\text{O}_2$ , and (b) after cycle test conditions, respectively



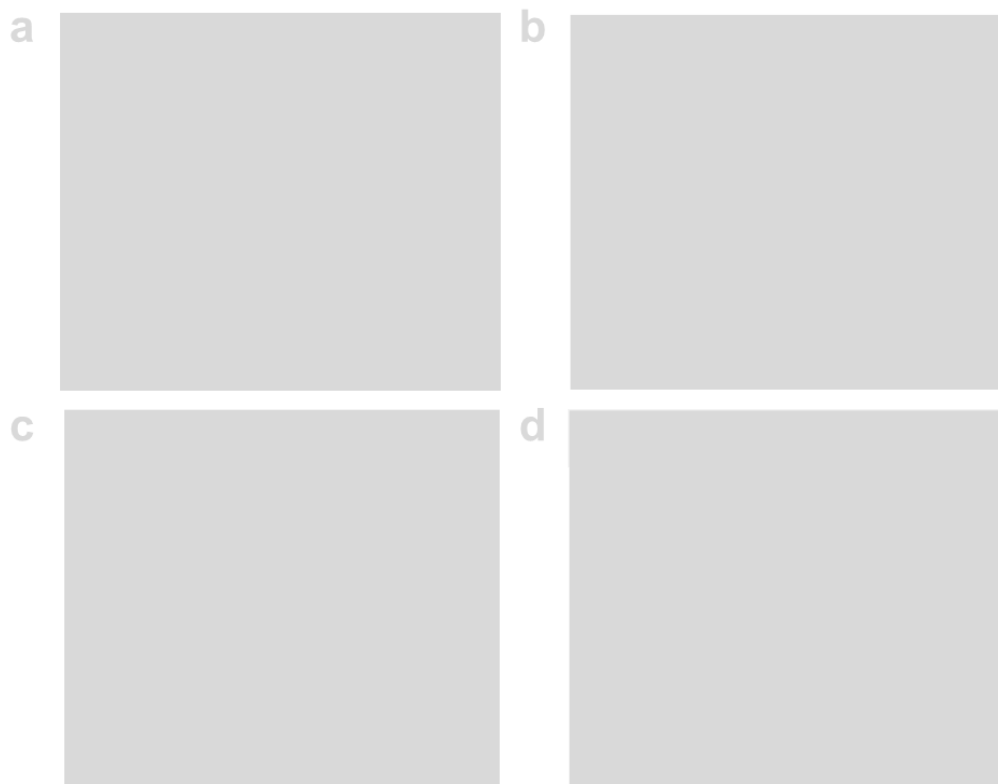

**Fig S14.** SEM images of  $\text{Ti}_{0.87}\text{O}_2$  and FTS- $\text{Ti}_{0.87}\text{O}_2$ : (a, b) before and (c, d) after cycle test conditions

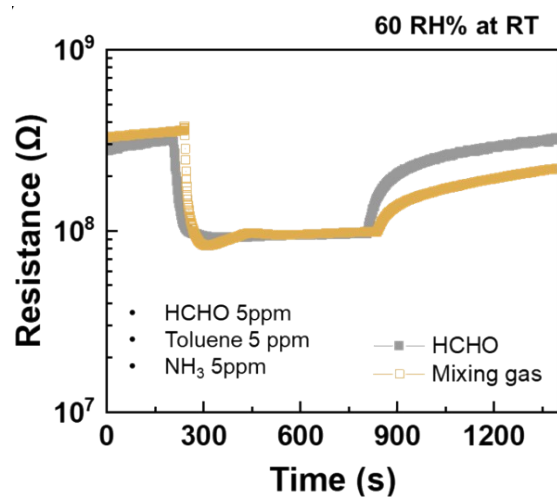

**Fig. S15** Gas sensing properties of FTS- $\text{Ti}_{0.87}\text{O}_2$  of formaldehyde gas detection in various mixing gases (toluene, ammonia, formaldehyde)

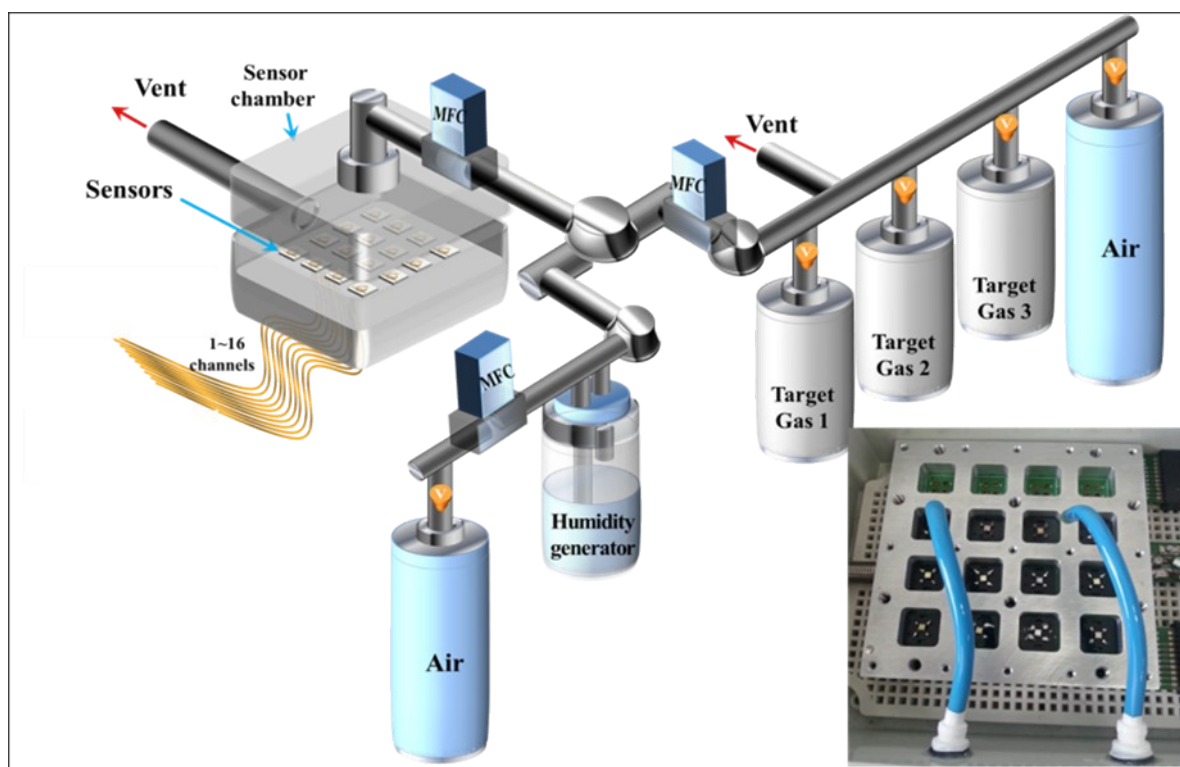

**Fig. S16.** The photo of the sensing system in working condition.

**Table S1.** Comparison of the sensing performance of HCHO sensors at room temperature

| No. | Reference                                 | Material                                                                                | Structures            | Concentration | Response | Response time | Limit of detect |
|-----|-------------------------------------------|-----------------------------------------------------------------------------------------|-----------------------|---------------|----------|---------------|-----------------|
|     | This work                                 | Ti <sub>0.87</sub> O <sub>2</sub>                                                       | Porous Nanosheet      | 5 ppm         | 213 %    | 97 s          | 99.13 ppb       |
| 1   | J. Mater. Chem., 2012, 22, 12915-12920    | In <sub>2</sub> O <sub>3</sub> /ZnO                                                     | Nanoflowers           | 5 ppm         | 19 %     | -             | 5 ppm           |
| 2   | Nanoscale 4 (2012) 5651-5658.             | ZnO QDs/graphene                                                                        | Nanosheet             | 100 ppm       | 2.10 %   | 30 s          | 25 ppm          |
| 3   | Appl. Phys. Lett. 105, 033107 (2014)      | ZnO/graphene                                                                            | Thin film             | 9 ppm         | 1.50 %   | 36 s          | 135 ppb         |
| 4   | Sens. Actuators, B, 2015, 221, 1290-1298  | ZnO/rGO                                                                                 | Nanoflowers           | 15 ppm        | 6 %      | 34 s          | 2 ppm           |
| 5   | J. Electrochem. Soc., 2016, 163, B517     | Au@ZnO                                                                                  | Nanosheet-sphere      | 5 ppm         | 10.57 %  | 13.8 s        | 1 ppm           |
| 6   | Sens. Actuators, B 256 (2018) 1011-1020.  | SnO <sub>2</sub> /VG                                                                    | Thin film             | 5 ppm         | 5.50 %   | 46 s          | 0.02 ppm        |
| 7   | Microchemical Journal 160 (2021) 105607   | ZnO-ANS-rGO                                                                             | Nanosheet             | 5 ppm         | 1.05 %   | 300 s         | 5 ppm           |
| 8   | Applied Surface Science 605 (2022) 154839 | Au-In <sub>2</sub> O <sub>3</sub> / Ti <sub>3</sub> C <sub>2</sub> T <sub>x</sub> Mxene | Nanosphere/nanosheets | 5 ppm         | 31 %     | 5 s           | 5 ppm           |
| 9   | Materials Letters 350 (2023): 134927      | NiCo <sub>2</sub> O <sub>4</sub>                                                        | Nanoneedles           | 50 ppm        | 1.85 %   | 22 s          | 10 ppm          |
| 10  | Results in Chemistry 5 (2023) 100946      | TiO <sub>2</sub>                                                                        | Thin film             | 20 ppm        | 85.87 %  | 35 s          | 1 ppm           |
| 11  | Nature Communications (2021) 12:4955      | MMM (ZIF-7/PEBA) - coated TiO <sub>2</sub>                                              | Membrane              | 5 ppm         | 1350     | 57.4 s        | 3.8 ppb         |
| 12  | Sci. Adv. 10, eadk6856 (2024)             | 3D printed QDs/rGO                                                                      | Aerogels              | 1 ppm         | 15.23%   | < 30 s        | 8.02 ppb        |
